# Supplementary material for: The ESX-3 Secretion System Is Necessary for Iron and Zinc Homeostasis in Mycobacterium tuberculosis
Source: PubMed Central journal article supplement (PMC3796483; doi:10.1371/journal.pone.0078351), 2013-10-14
Supplement: pone.0078351.s007.pdf [file pone.0078351.s007.pdf]

**Table S1. List of the strains and plasmids used and constructed in this study.**

| Strains                | Genotype                                                                                                                          | References                   |
|------------------------|-----------------------------------------------------------------------------------------------------------------------------------|------------------------------|
| <i>M. tuberculosis</i> |                                                                                                                                   |                              |
| TB79                   | Conditional mutant <i>Pptr::esx-3</i> derived by TB38                                                                             | Serafini, et al. 2009        |
| TB38                   | TetR-Pip system in L5 <i>attB</i> site derived by H37Rv                                                                           | Boldrin et al. 2010          |
| <i>M. smegmatis</i>    |                                                                                                                                   |                              |
| mc <sup>2</sup> 155    | Wild type                                                                                                                         | Laboratory stock             |
| MS190                  | <i>esx-3</i> null mutant                                                                                                          | This study                   |
| MS192                  | <i>esx-3</i> null mutant with pJV53 plasmid                                                                                       | This study                   |
| MS195                  | <i>esx-3/xfbA</i> null mutant                                                                                                     | This study                   |
| MS197                  | <i>xfbA</i> null mutant                                                                                                           | This study                   |
| MS81.1                 | mc <sup>2</sup> 155 with pJV53 plasmid                                                                                            | Laboratory stock             |
| Plasmids               |                                                                                                                                   |                              |
| p2NIL                  | Suicide vector for mycobacteria OriE (Kan <sup>R</sup> )                                                                          | Parish and Stoker, 2000      |
| pGOAL19                | OriE; <i>LacZ SacB</i> genes; (Amp <sup>R</sup> ; Hygro <sup>R</sup> )                                                            | Parish and Stoker, 2000      |
| pAL70                  | OriE; <i>dif</i> cassette (Hygro <sup>R</sup> )                                                                                   | Cascioferro et al., 2010     |
| pJV53                  | Replicative vector for mycobacteria. OriE; OriM; recombinant protein gp60-gp61 of the Che9c mycobacteriophage (Kan <sup>R</sup> ) | Van Kessel and Hatfull, 2007 |
| pCR-BluntII-TOPO       | OriE (Zeo <sup>R</sup> ; Kan <sup>R</sup> )                                                                                       | Invitrogen                   |
| pAGN25                 | Suicide vector derived from p2NIL OriE (Kan <sup>R</sup> )                                                                        | This study                   |
| pAGN27                 | Suicide vector derived by pAGN25 OriE; <i>LacZ SacB</i> genes; (Amp <sup>R</sup> ; Hygro <sup>R</sup> )                           | This study                   |
| pAGN29                 | Derived by pCR-BluntII-TOPO OriE (Zeo <sup>R</sup> ; Kan <sup>R</sup> )                                                           | This study                   |
| pAGN30                 | Derived by pAGN29 OriE <i>LacZ SacB</i> (Zeo <sup>R</sup> ; Kan <sup>R</sup> Hygro <sup>R</sup> )                                 | This study                   |

- Boldrin F, Casonato S, Dainese E, Sala C, Dhar N, et al. (2010) Development of a repressible mycobacterial promoter system based on two transcriptional repressors. *Nucleic Acids Res* 38:e134.
- Cascioferro A, Boldrin F, Serafini A, Provvedi R, Palu G, et al. (2010) Xer site-specific recombination, an efficient tool to introduce unmarked deletions into mycobacteria. *Appl Environ Microbiol* 76: 5312-5316.
- Parish T, Stoker NG (2000) Use of a flexible cassette method to generate a double unmarked *Mycobacterium tuberculosis* tlyA plcABC mutant by gene replacement. *Microbiology* 146: 1969-1975.
- Serafini A, Boldrin F, Palu G, Manganelli R (2009) Characterization of a *Mycobacterium tuberculosis* ESX-3 conditional mutant: essentiality and rescue by iron and zinc. *J Bacteriol* 191: 6340-6344.
- van Kessel JC, Hatfull GF (2007) Recombineering in *Mycobacterium tuberculosis*. *Nat Methods* 4: 147-152.
