# Supplementary material for: The ESX-3 Secretion System Is Necessary for Iron and Zinc Homeostasis in Mycobacterium tuberculosis
Source: PubMed Central journal article supplement (PMC3796483; doi:10.1371/journal.pone.0078351), 2013-10-14
Supplement: pone.0078351.s008.pdf [file pone.0078351.s008.pdf]

**Table S2. List of primers used in this study for mutants construction.** The restriction sites are indicated in bold.

| Name        | Sequence                                        |
|-------------|-------------------------------------------------|
| RP1215 (Fw) | <b>GGATCC</b> GTTCGACCTTCGTGATGACTG             |
| RP1216 (Rv) | <b>ATCGATGC</b> ATAGGCAAGTTGGAAGTC              |
| RP1217 (Fw) | <b>ATCGATGC</b> GCATCAACATCTCACTG               |
| RP1218 (Rv) | <b>AGTACTGT</b> GGTCAGGAACATGCCTTT              |
| RP1258 (Fw) | GAACTGGGCTTCACCTAC                              |
| RP1279 (Rv) | CCTGTCCAGATAACCGACCA                            |
| RP1277 (Fw) | GAGTTCGGTGTGGACTTCGT                            |
| RP1278 (Rv) | GACCTGCCATCGTGAAACTC                            |
| RP1261 (Fw) | GCTATGCATCA <b>AAGCTT</b> ACTTGAGATTTTCGGCTCACG |
| RP1262 (Rv) | GGTAGCGAATAG <b>ATCT</b> CACAGGAAACACCCAGCTTT   |
| RP1263 (Fw) | ATTCGCCCTTAG <b>ATCT</b> ATTCGCTACCGTTTGACCAC   |
| RP1264 (Rv) | AATTGGGCCCT <b>CTAG</b> ATTTTCCGCATCAGAAGGTGT   |
| RP472 (Rv)  | GGCTTGGTGGACCTCGAC                              |
| RP747 (Fw)  | CGCCTTCACCTTCCTGCACGACTT                        |
| RP1308 (Fw) | TAGACCACGGTCAACACCAC                            |
| RP1309 (Rv) | TGACTCACACGCCAGAGAAC                            |
