# Supplementary material for: The ESX-3 Secretion System Is Necessary for Iron and Zinc Homeostasis in Mycobacterium tuberculosis
Source: PubMed Central journal article supplement (PMC3796483; doi:10.1371/journal.pone.0078351), 2013-10-14
Supplement: pone.0078351.s009.pdf [file pone.0078351.s009.pdf]

**Table S3. List of the primers used in for real time RT-PCR.**

| Name                 | Sequence             | Gene name     |
|----------------------|----------------------|---------------|
| RP1070 (Fw)          | GCTGTCGGATACCAGCTTCG | <i>rv0282</i> |
| RP1071 (Rv)          | GACACCTGGCGTTTGACCTC |               |
| RP1516 (Fw)          | CCATCCCGAAAAGGAAGACC | <i>sigA</i>   |
| RP1517 (Rv)          | AGGTCTGGTTCAGCGTCGAG |               |
| RP1163 (Fw)          | ACTCGATCCGGATGATGTCG | <i>mbtB</i>   |
| RP1164 (Rv)          | GCTCGCCTTCCTGGGATAAC |               |
| RP1165 (Fw)          | GGGTTCAGGGTGTGATGTT  | <i>irtA</i>   |
| RP1166 (Rv)          | GCTGGAACTCGGTGTTGGAC |               |
| RP1399 (Fw)          | AAAATCCCGGCGGTCTCTAC | <i>rv1460</i> |
| RP1400 (Rv)          | GATCAGCGCGTCCAGATGAC |               |
| RP1401(Fw)           | CAGGGGTCGATCCCAAGAAT | <i>rv0097</i> |
| RP1402 (Rv)          | GATCTCCGGGTGGTCTTCGT |               |
| RP131 <sup>(1)</sup> | GTCCGCCCACTGCCAAG    | <i>rpmB2</i>  |
| RP132 <sup>(1)</sup> | GGACACCCGCAGCCGAA    |               |
| RP288 <sup>(1)</sup> | ACCGCCGCCGTGACCGC    | <i>rv2059</i> |
| RP289 <sup>(1)</sup> | CGGGGGTGGTGGTCGGG    |               |

(1) Maciag, A., E. Dainese, G. M. Rodriguez, A. Milano, R. Provvedi, M. R. Pasca, I. Smith, G. Palu, G. Riccardi, and R. Manganeli. 2007. Global Analysis of the Mycobacterium tuberculosis Zur (FurB) Regulon. J Bacteriol 189:730-740.
