# Supplementary material for: The ESX-3 Secretion System Is Necessary for Iron and Zinc Homeostasis in Mycobacterium tuberculosis
Source: PubMed Central journal article supplement (PMC3796483; doi:10.1371/journal.pone.0078351), 2013-10-14
Supplement: pone.0078351.s010.pdf [file pone.0078351.s010.pdf]

**Table S4. Differentially regulated genes in ESX-3-depleted *M. tuberculosis***

| Upregulated genes |               |         |                |                                                                                                                                       |                                    |
|-------------------|---------------|---------|----------------|---------------------------------------------------------------------------------------------------------------------------------------|------------------------------------|
| Locus             | Gene Name     | q-value | Fold induction | Gene Product/Function                                                                                                                 | Regulation                         |
| ORF01283          |               | 0       | 12.96          | Hypothetical ORF                                                                                                                      |                                    |
| ORFD1079          |               | 0       | 7.33           | Hypothetical ORF                                                                                                                      |                                    |
| ORF00540          |               | 0       | 2.1            | Hypothetical ORF                                                                                                                      |                                    |
| Rv0097            |               | 0       | 5.3 (15)       | Possible oxidoreductase, predicted to be in SenX3-RegX3 regulon                                                                       |                                    |
| Rv0099            | <i>fadD10</i> | 0.75    | 7.57           | Possible fatty-acid-CoA ligase                                                                                                        |                                    |
| Rv0146            |               | 0       | 2.48           | Possible methyltransferase S-adenosylmethionine dependent                                                                             |                                    |
| Rv0211            | <i>pckA</i>   | 0       | 2.49           | Probable iron-regulated phosphoenolpyruvate carboxykinase                                                                             |                                    |
| Rv0280            | PPE3          | 0       | 8.99           | Unknown function                                                                                                                      | Zur                                |
| Rv0281            |               | 0.75    | 2.8            | Possible S-adenosylmethionine dependent methyl transferase                                                                            | Zur                                |
| Rv0450c           | <i>mmpL4</i>  | 0.64    | 2.01           | Siderophore export protein                                                                                                            | IdeR                               |
| Rv0451c           | <i>mmpS4</i>  | 0.65    | 2.29           | Siderophore export protein                                                                                                            | IdeR                               |
| Rv0465c           |               | 0       | 2.37           | Probable transcriptional regulatory protein                                                                                           | IdeR-independent<br>iron repressed |
| Rv0467            | <i>icl1</i>   | 0       | 3.32           | Isocitrate lyase                                                                                                                      | IdeR-independent<br>iron repressed |
| Rv0468            | <i>fadB2</i>  | 0       | 1.82           | Involved in the butyryl-butanol producing pathway/Probable 3-hydroxybutyryl-CoA dehydrogenase                                         |                                    |
| Rv1342c           | <i>pks14</i>  | 0       | 2.31           | Conserved membran protein                                                                                                             |                                    |
| Rv1343c           | <i>lprD</i>   | 0       | 2.27           | Probable conserved lipoprotein                                                                                                        | IdeR                               |
| Rv1344            | <i>mbtL</i>   | 0       | 2.28           | Thought to be involved in the biogenesis of the hydroxyphenyloxaoline-containing siderophore mycobactins                              | IdeR                               |
| Rv1347c           | <i>mbtK</i>   | 0       | 3.92           | Lysine N-acetyltransferase/ Thought to be involved in the biogenesis of the hydroxyphenyloxaoline-containing siderophore mycobactins/ | IdeR                               |
| Rv1348            | <i>irtA</i>   | 2.22    | 4.78 (5.4)     | Iron regulated transporter                                                                                                            | IdeR                               |
| Rv1349            | <i>irtB</i>   | 3.78    | 2.39           | Iron regulated transporter                                                                                                            | IdeR                               |
| Rv1460            |               | 0       | 2.32 (2.4)     | Probable transcriptional regulatory protein                                                                                           | IdeR-independent<br>iron repressed |
| Rv1461            |               | 0       | 2.79           | Conserved hypothetical protein                                                                                                        | IdeR-independent<br>iron repressed |
| Rv1462            |               | 0.82    | 2.44           | Conserved hypothetical protein                                                                                                        | IdeR-independent<br>iron repressed |
| Rv1463            |               | 0       | 2.62           | Probable ABC transporter                                                                                                              | IdeR-independent<br>iron repressed |
| Rv1464            | <i>csd</i>    | 0       | 2.61           | Probable cysteine desulfurase                                                                                                         | IdeR-independent<br>iron repressed |
| Rv1465            |               | 0.72    | 2.06           | Possible nitrogen fixation related protein                                                                                            | IdeR-independent<br>iron repressed |
| Rv1466            |               | 0       | 2.59           | Conserved hypothetical protein                                                                                                        | IdeR-independent<br>iron repressed |
| Rv1519            |               | 0       | 2.96           | Conserved hypothetical protein                                                                                                        | IdeR                               |

|         |                  |      |             |                                                                                                          |      |
|---------|------------------|------|-------------|----------------------------------------------------------------------------------------------------------|------|
| Rv1592c |                  | 0    | 2.1         | Conserved hypothetical protein                                                                           |      |
| Rv1854  | <i>ndh</i>       | 0    | 2.03        | NADH dehydrogenase                                                                                       |      |
| Rv2055c | <i>rpsR2</i>     | 0    | 12.39       | Probable ribosomal protein S18/ involved in translation                                                  | Zur  |
| Rv2056c | <i>rpsN2</i>     | 0    | 15.76       | Probable ribosomal protein S14/ involved in translation                                                  | Zur  |
| Rv2057c | <i>rpmG</i>      | 0    | 17.67       | Probable ribosomal protein L33/ involved in translation                                                  | Zur  |
| Rv2058c | <i>rpmB2</i>     | 0    | 15.13 (9.8) | Probable ribosomal protein L28/ involved in translation                                                  | Zur  |
| Rv2059  |                  | 0    | 2.73 (3.9)  | Similar to periplasmic metal binding proteins of ABC transport system                                    | Zur  |
| Rv2060  |                  | 1,19 | 2.53        | Similar to ZnuB, ABC-type Mn2/Zn2 transport systems, permease components                                 | Zur  |
| Rv2121c | <i>hisG</i>      | 2,01 | 2.09        | Thought to be involved in histidine biosynthesis/ Probable ATP phosphoribosyltransferase                 |      |
| Rv2122c | <i>hisI/hisE</i> | 0    | 5.13        | Probable phosphoribosyl-AMP pyrophosphatase/ thought to be involved in histidine biosynthesis            | IdeR |
| Rv2123  | PPE37            | 0    | 10.75       | PPE family                                                                                               | IdeR |
| Rv2377c | <i>mbtH</i>      | 0,8  | 3.68        | Thought to be involved in the biogenesis of the hydroxyphenyloxaoline-containing siderophore mycobactins | IdeR |
| Rv2380c | <i>mbtE</i>      | 2.01 | 5.08        | Thought to be involved in the biogenesis of the hydroxyphenyloxaoline-containing siderophore mycobactins | IdeR |
| Rv2381c | <i>mbtD</i>      | 0    | 5.92        | Thought to be involved in the biogenesis of the hydroxyphenyloxaoline-containing siderophore mycobactins | IdeR |
| Rv2382c | <i>mbtC</i>      | 0    | 7.51        | Thought to be involved in the biogenesis of the hydroxyphenyloxaoline-containing siderophore mycobactins | IdeR |
| Rv2383c | <i>mbtB</i>      | 0    | 8.6 (27.1)  | Thought to be involved in the biogenesis of the hydroxyphenyloxaoline-containing siderophore mycobactins | IdeR |
| Rv2384c | <i>mbtA</i>      | 2.47 | 2.4         | Thought to be involved in the biogenesis of the hydroxyphenyloxaoline-containing siderophore mycobactins | IdeR |
| Rv2386c | <i>mbtI</i>      | 0    | 21.43       | Thought to be involved in the biogenesis of the hydroxyphenyloxaoline-containing siderophore mycobactins | IdeR |
| Rv2429  | <i>ahpD</i>      | 0    | 4.22        | Involved in response to oxidative stress/Alkyl hydroperoxide reductase D protein                         |      |
| Rv2707  |                  | 0    | 2.07        | Conserved transmembrane alanine and leucine rich protein                                                 |      |
| Rv3403c |                  | 3.9  | 1.9         | Hypothetical protein                                                                                     | IdeR |
| Rv3839  |                  | 0    | 9.88        | Conserved hypothetical protein                                                                           | IdeR |
| Rv3840  |                  | 0    | 2.99        | Probable transcriptional regulatory protein                                                              | IdeR |
| Rv3862c | <i>whiB6</i>     | 0    | 2.19        | Probable transcriptional regulatory protein whiB-like                                                    |      |

#### Down regulated genes

| Locus    | Gene Name    | q-value | Fold repression | Gene Product/Function                                        | Regulation |
|----------|--------------|---------|-----------------|--------------------------------------------------------------|------------|
| ORFD0126 |              | 0       | 0.57            | Hypothetical ORF                                             |            |
| Rv0165c  | <i>mce1R</i> | 0       | 0.65            | Probable transcriptional regulatory protein                  |            |
| Rv0166   | <i>fadD5</i> | 0       | 0.51            | Involved in lipid degradation/probable fatty-acid-CoA ligase |            |
| Rv0283   | <i>eccB3</i> | 0       | 0.25            | Esx-3 component/Membrane protein                             | IdeR/Zur   |
| Rv0285   | PE           | 2.17    | 0.27            | Esx-3 component/PE5                                          | IdeR/Zur   |
| Rv0289   | <i>eccG3</i> | 0.88    | 0.24            | Esx-3 component/ESX-1 secreted associated protein ESPG3      | IdeR/Zur   |
| Rv0290   | <i>eccD3</i> | 0       | 0.19            | Esx-3 component/Transmembrane protein                        | IdeR/Zur   |
| Rv0291   | <i>mycP3</i> | 0       | 0.27            | Esx-3 component/Serine protease (subtilisin-like protease)   | IdeR/Zur   |

|         |               |      |      |                                                                                   |              |
|---------|---------------|------|------|-----------------------------------------------------------------------------------|--------------|
| Rv0292  | <i>eccE3</i>  | 0    | 0.24 | Esx-3 component/Transmembrane protein                                             | IdeR/Zur     |
| Rv0458  |               | 0    | 0.61 | Probable aldehyde dehydrogenase                                                   |              |
| Rv1813c |               | 0    | 0.49 | Conserved hypothetical protein/ regulated by MprA and DosR                        |              |
| Rv3145  | <i>nuoA</i>   | 0    | 0.34 | Involved in aerobic-anaerobic respiration/probable NADH dehydrogenase I (chain A) | Iron induced |
| Rv3147  | <i>nuoC</i>   | 0    | 0.48 | Involved in aerobic-anaerobic respiration/probable NADH dehydrogenase I (chain C) | Iron induced |
| Rv3148  | <i>nuoD</i>   | 5.58 | 0.42 | Involved in aerobic-anaerobic respiration/probable NADH dehydrogenase I (chain D) | Iron induced |
| Rv3149  | <i>nuoE</i>   | 0    | 0.48 | Involved in aerobic-anaerobic respiration/probable NADH dehydrogenase (chain E)   | Iron induced |
| Rv3151  | <i>nuoG</i>   | 0    | 0.59 | Involved in aerobic-anaerobic respiration/probable NADH dehydrogenase (chain G)   | Iron induced |
| Rv3152  | <i>nuoH</i>   | 0.88 | 0.54 | Involved in aerobic-anaerobic respiration/probable NADH dehydrogenase (chain H)   | Iron induced |
| Rv3153  | <i>nuoI</i>   | 0    | 0.55 | Involved in aerobic-anaerobic respiration/probable NADH dehydrogenase (chain I)   | Iron induced |
| Rv3154  | <i>nuoJ</i>   | 0    | 0.6  | Involved in aerobic-anaerobic respiration/probable NADH dehydrogenase (chain J)   | Iron induced |
| Rv3156  | <i>nuoL</i>   | 5.46 | 0.59 | Involved in aerobic-anaerobic respiration/probable NADH dehydrogenase (chain L)   | Iron induced |
| Rv3157  | <i>nuoM</i>   | 2.46 | 0.52 | Involved in aerobic-anaerobic respiration/probable NADH dehydrogenase (chain M)   | Iron induced |
| Rv3158  | <i>nuoN</i>   | 1.14 | 0.67 | Involved in aerobic-anaerobic respiration/probable NADH dehydrogenase (chain N)   | Iron induced |
| Rv3295  |               | 0    | 0.47 | Probable transcriptional regulatory protein (Tet-R family)                        |              |
| Rv3550  | <i>echA20</i> | 0    | 0.6  | Enoyl-CoA hydratase                                                               |              |

Differently expressed genes were defined by a  $q$ -value equal to 0 and a fold difference  $\geq 1.8$  (induced) or  $\leq 0.6$  (repressed). Differentially regulated genes with  $q$ -value until 5,58 were included if part of an operon or regulon differentially regulated or if their up regulation was observed by real time RT-PCR (i.e. *irtA* and *irtB*). Values in brackets indicate the fold induction determined by quantitative real time RT-PCR. Genes were annotated as described in TUBERCULIST <http://tuberculist.epfl.ch/>
